# Supplementary material for: Zeylenone promotes apoptosis in chronic myelogenous leukemia-derived K562 cells by a mechanism involving Jak2 and Src kinase
Source: Royal Society of Chemistry journal article supplement (doi:10.1039/c6ra23443g), 2016-01-01

Inhibitory effect of Zey on cancer cells after Zey treatment for 48 h.

| <b>Cell lines</b> | <b>IC50 (<math>\mu\text{M}</math>)</b> |
|-------------------|----------------------------------------|
| Reh               | 2.76                                   |
| RS4;11            | 0.36                                   |
| HL-60             | 2.07                                   |
| Jurkat            | 1.59                                   |
| Molt-4            | 2.31                                   |
| Astrocyte         | 7.52                                   |
| Raji              | 2.22                                   |
| U251              | 4.84                                   |
| U87               | 5.05                                   |
| U373              | 4.25                                   |
| CHO               | 23.61                                  |
| L02               | 24.33                                  |
| PBMC              | 43.25                                  |

# Report of Human Cell Line Authentication

Delivery Date: September 05<sup>th</sup>, 2016

Analysis Date: September 09<sup>th</sup>, 2016

## I. Sample

Sample Name: 'XB4628', labeled as 'K-562', and was received on September 05<sup>th</sup>, 2016.

## II. Method and Procedure

1. PCR is amplified with STR Multi-amplification Kit (Microreader™21 ID System);
2. PCR products are assayed with ABI 3730xl DNA Analyzer (Applied Biosystems®).
3. Data were analyzed using GeneMapper 3.2 software and then compared with the ATCC and DSMZ databases for reference matching.

## III. Results

1. The results of the negative and positive control match expectations.
2. The STR profiles of the cell line sample are in the attached table and figure.

| Genetic Site | ATCC                    |    |  |  | Customer sample      |    |  |  |  |
|--------------|-------------------------|----|--|--|----------------------|----|--|--|--|
| (Locus)      | Database profile: K-562 |    |  |  | Query profile: K-562 |    |  |  |  |
| Amelogenin   | X                       |    |  |  | X                    |    |  |  |  |
| D5S818       | 11                      | 12 |  |  | 11                   | 12 |  |  |  |
| D13S317      | 8                       |    |  |  | 8                    |    |  |  |  |
| D7S820       | 9                       | 11 |  |  | 9                    | 11 |  |  |  |
| D16S539      | 11                      | 12 |  |  | 11                   | 12 |  |  |  |
| vWA          | 16                      |    |  |  | 16                   |    |  |  |  |
| TH01         | 9.3                     |    |  |  | 9.3                  |    |  |  |  |
| TPOX         | 8                       | 9  |  |  | 8                    | 9  |  |  |  |

|                                                                    |   |    |  |  |   |    |  |  |      |
|--------------------------------------------------------------------|---|----|--|--|---|----|--|--|------|
| CSF1PO                                                             | 9 | 10 |  |  | 9 | 10 |  |  |      |
| Number of shared alleles between query sample and database profile |   |    |  |  |   |    |  |  | 14   |
| Total number of alleles in the database profile                    |   |    |  |  |   |    |  |  | 14   |
| Percent match between the query and the database profile:          |   |    |  |  |   |    |  |  | 100% |

K-562: ①No cross-contamination of other human cell line is found. ②The submitted profile is an 100% match for the following ATCC human cell line(s) in the ATCC STR database (8 core loci plus Amelogenin): K-562.100% matched cell lines are found in DSMZ data bank.

Operator: Xuedan Guo

Auditor: Xuejia Sun

Beijing Microread Genetics Co., Ltd

Notes:

1. Based on the ANSI Standard, cell lines with  $\geq 80\%$  match are considered to be related; i.e., derived from a common ancestry. Cell lines with between a 55% to 80% match require further profiling for authentication of relatedness.
2. The short tandem repeat (STR) profile generated by Beijing Microread Genetics Co., Ltd is indicative only of the sample sent to Beijing Microread Genetics Co., Ltd at the time it was sent. This data and analysis are for research use only.

Table: STR profiles of K-562 cell line

| Cell line K-562 (Fig. XB4628) |          |          |          |
|-------------------------------|----------|----------|----------|
| Marker                        | Allele 1 | Allele 2 | Allele 3 |
| D19S433                       | 14       | 14.2     |          |
| D5S818                        | 11       | 12       |          |
| D21S11                        | 29       | 30       | 31       |
| D18S51                        | 15       | 16       |          |
| D6S1043                       | 11       | 15       |          |
| AMEL                          | X        | X        |          |
| D3S1358                       | 16       | 16       |          |
| D13S317                       | 8        | 8        |          |
| D7S820                        | 9        | 11       |          |
| D16S539                       | 11       | 12       |          |
| CSF1PO                        | 9        | 10       |          |
| Penta D                       | 9        | 13       |          |
| D2S441                        | 10       | 14       |          |
| vWA                           | 16       | 16       |          |
| D8S1179                       | 12       | 12       |          |
| TPOX                          | 8        | 9        |          |
| Penta E                       | 5        | 14       |          |
| TH01                          | 9.3      | 9.3      |          |
| D12S391                       | 23       | 23       |          |
| D2S1338                       | 17       | 17       |          |
| FGA                           | 21       | 24       |          |

Figure: STR profiles of K-562 cell line

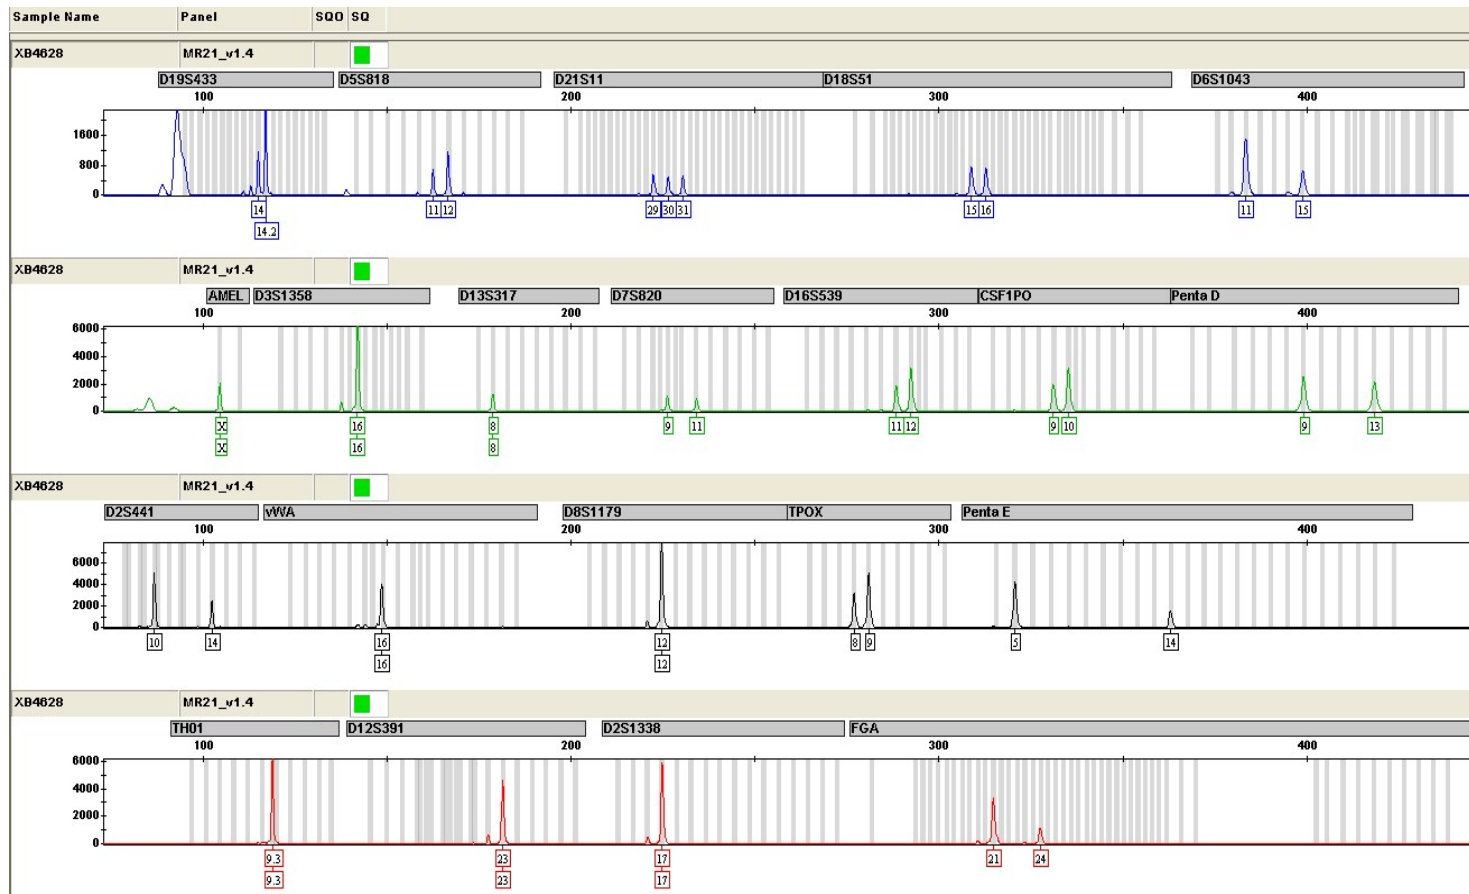

Supplement: c6ra23443g1.pdf [file c6ra23443g1.pdf]
